# Supplementary material
Source: PubMed Central journal article supplement (PMC11072733)
Supplement: 18_2023_4961_MOESM1_ESM.pdf [file 18_2023_4961_MOESM1_ESM.pdf]

fig. S1.

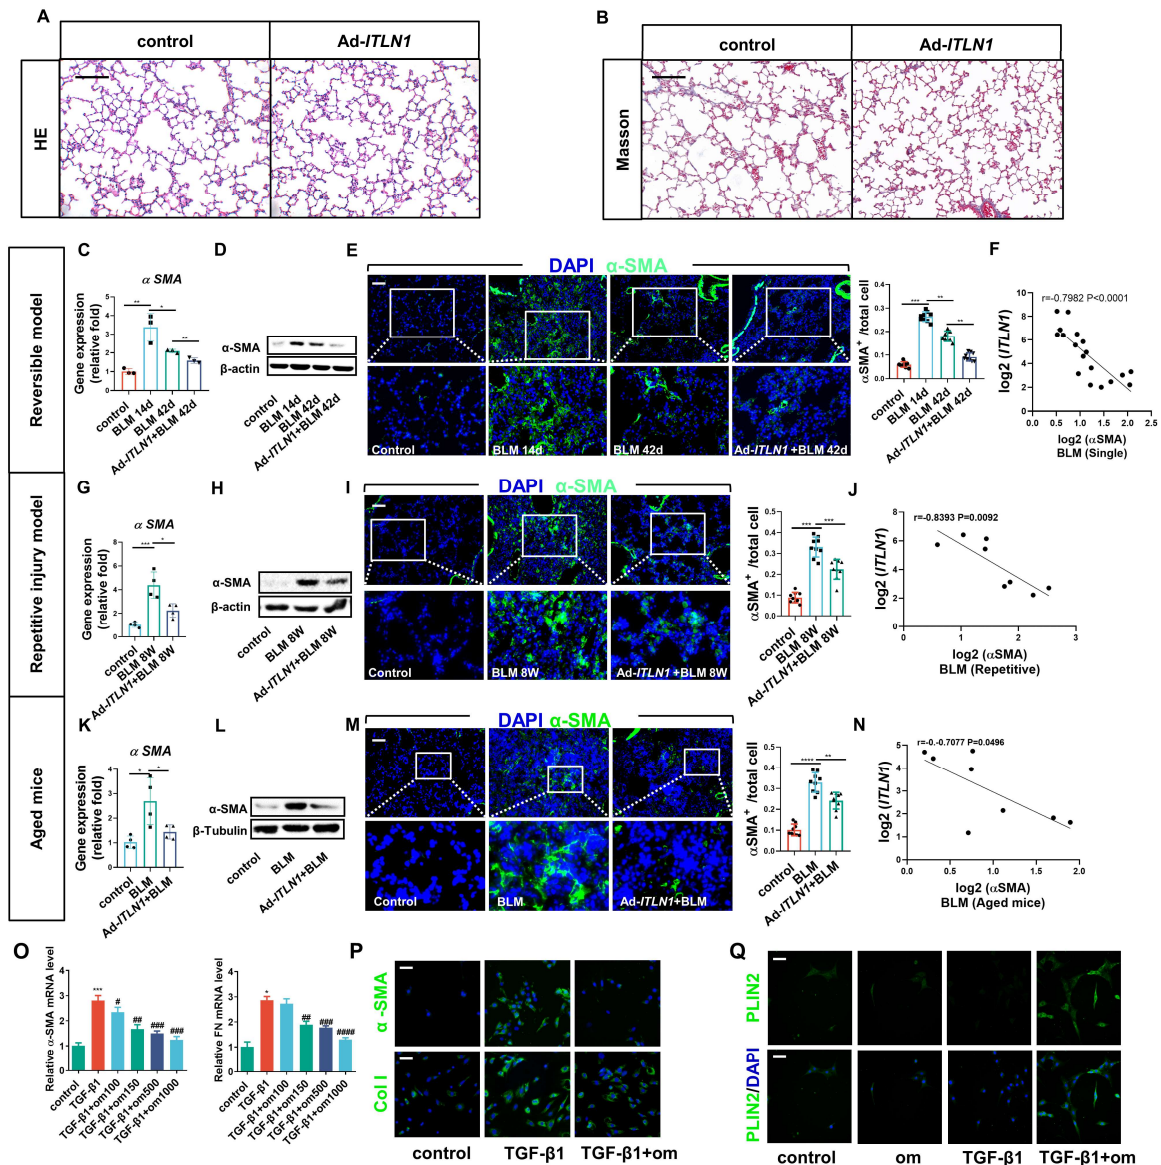

**fig. S1. Effects of omentin-1 overexpression on lung tissue structure and myofibroblasts and omentin-1 on TGF- $\beta$ 1-activated fibroblasts.** (A and B) Representative micrographs of H&E and Masson staining of lung sections, scale bar = 50  $\mu$ m (n = 3). (C, G and K) The mRNA level of  $\alpha$ -SMA in the lung tissue of mice detected by qPCR (n  $\geq$  3). (D, H and L) The content of  $\alpha$ -SMA in lung tissue detected by western blotting.  $\beta$ -actin or  $\beta$ -tubulin was used as the loading control (n = 3). (E, L and M) Immunofluorescent staining of  $\alpha$ -SMA<sup>+</sup> cells (myofibroblasts) and quantification of percentage of myofibroblasts in the lung according to immunofluorescent image, scale bar = 50  $\mu$ m (n  $\geq$  3). (F, J and N) The correlation between  $\alpha$ -SMA and omentin-1 mRNA level following BLM injury. (O) The mRNA level of  $\alpha$ -SMA and FN in fibroblast detected by qPCR (n = 3). (P) Immunofluorescent staining of  $\alpha$ -SMA (Green) in fibroblasts, scale bar = 50  $\mu$ m (n = 3). (Q) Immunofluorescent staining of PLIN2(Green) in fibroblasts, scale bar = 50  $\mu$ m (n = 3).

fig. S2.

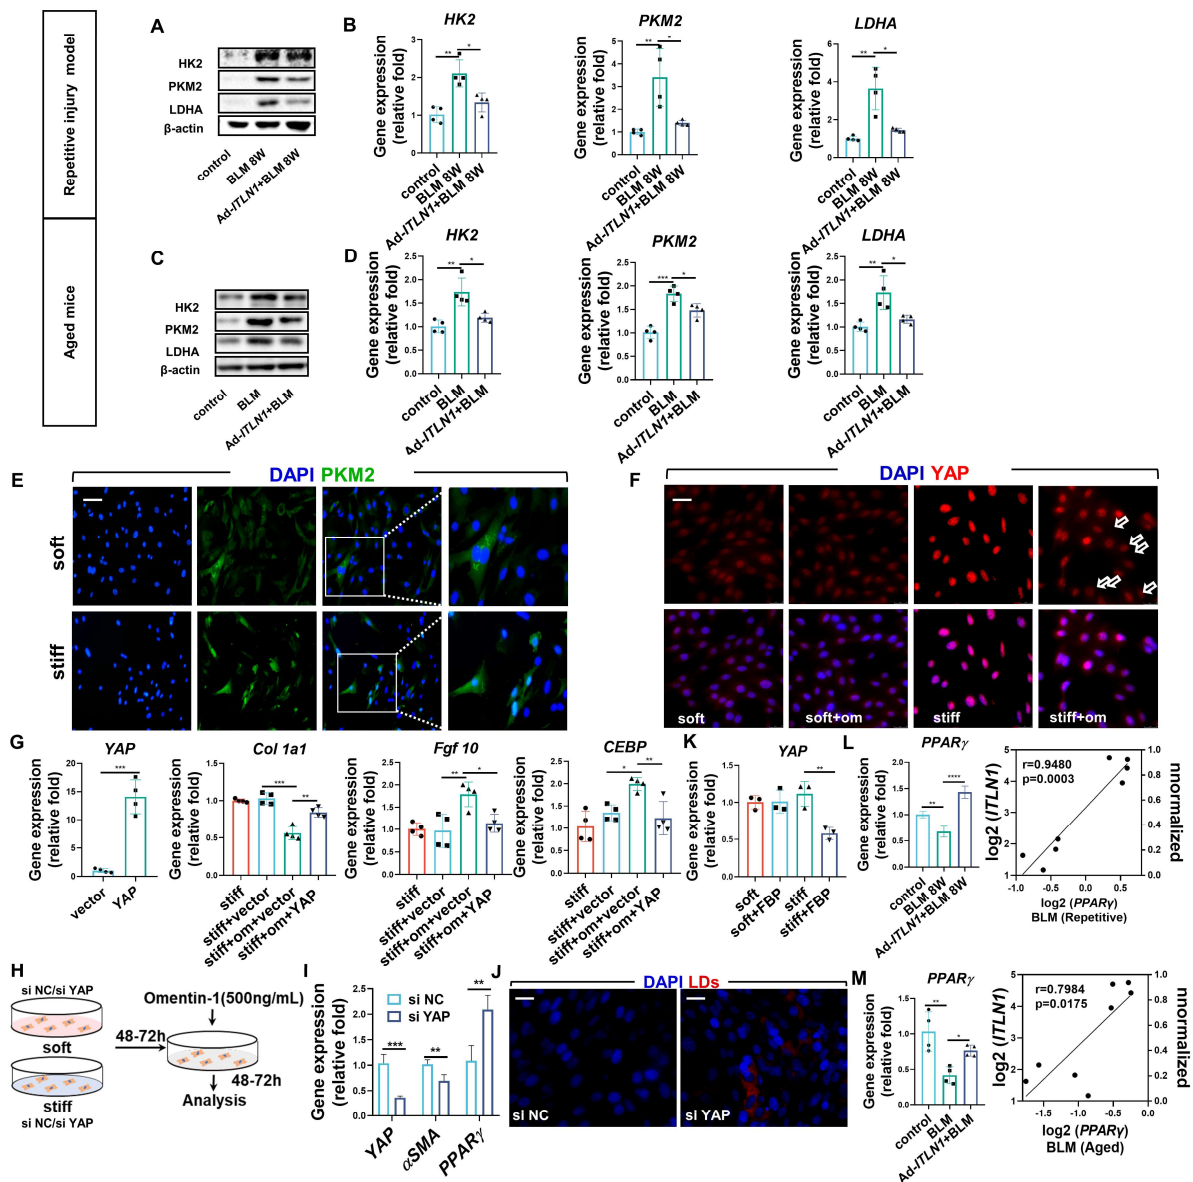

**fig. S2. Effect of Omentin-1 on glycolysis, YAP and PPAR $\gamma$ .** (A and C) The content of HK2, PKM2 and LDHA in the non-reversible fibrotic lung tissue detected by western blotting (n = 3). (B and D) The mRNA level HK2, PKM2 and LDHA in the non-reversible fibrotic lung tissue detected by qPCR (n = 4). (E) Subcellular locations of PKM2 in fibroblasts, scale bar = 50  $\mu$ m (n = 3). (F) The expression of YAP in nucleus of fibroblasts, scale bar = 50  $\mu$ m (n = 3). (G) The mRNA level of YAP gene overexpression, fibrosis genes Col1 and lipogenic genes (Fgf10 and CEBP) in negative control (vector) or YAP plasmid transfected fibroblasts detected by qPCR (n = 4). (H) Schematic for fibroblasts activated by stiff matrix transfected with specific siRNA and treated with omentin-1. (I) The mRNA level of YAP,  $\alpha$ -SMA and PLIN2 in si NC or si YAP transfected fibroblasts detected by qPCR (n = 4). (J) Staining of Lipid droplets with Nile red in fibroblasts, scale bar = 50  $\mu$ m (n = 3). (K) The mRNA level of YAP in fibroblasts with FBP treatment detected by qPCR (n = 3). (L and M) The mRNA level of PPAR $\gamma$  in the non-reversible fibrotic lung tissue of mice detected by qPCR (n = 4) and the correlation between PPAR $\gamma$  and omentin-1 mRNA levels in the non-reversible fibrosis model following BLM injury.

fig. S3.

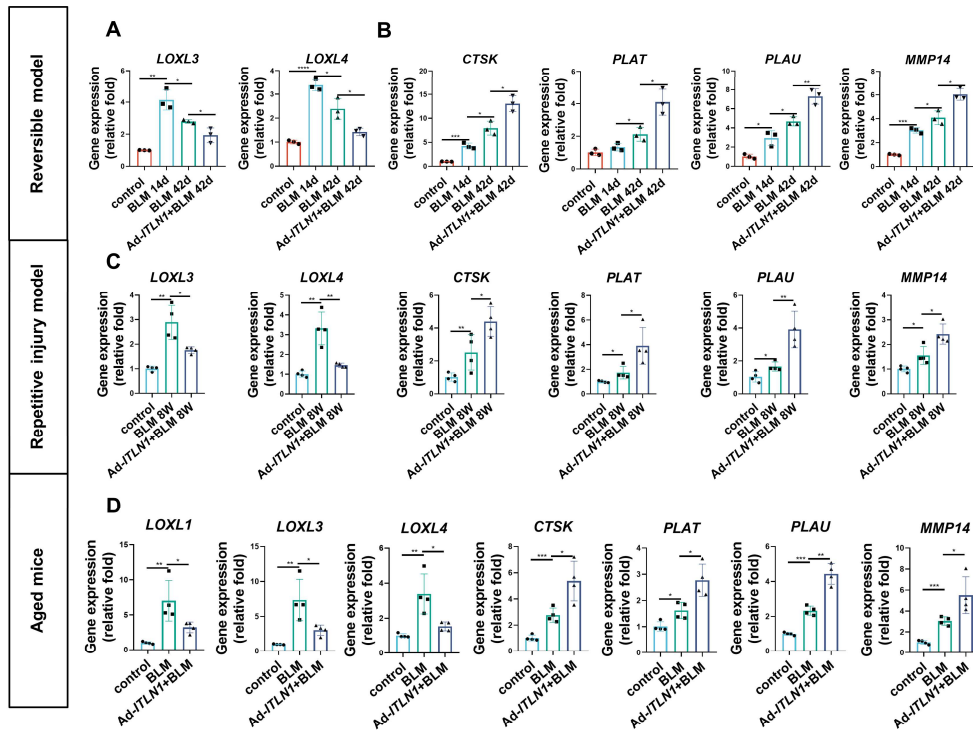

**fig. S3. Effects of omentin-1 on collagen synthesis and degradation related genes in reversible and non-reversible fibrosis. (A-D)** The mRNA level of ECM synthesis and degradation associated genes in the reversible and non-reversible fibrotic lung tissue detected by qPCR ( $n \geq 3$ ).

**Table S1. Polymerase chain reaction primers used in this study.**

|                                | Sequence                                               |
|--------------------------------|--------------------------------------------------------|
| <i>omentin-1</i>               | F: AGTGCAGCTGAAGAGAACCT, R: ACTTCCCACGCATGTTGTTC       |
| <i><math>\alpha</math>-SMA</i> | F: CTTCGCTGGTGATGATGCTC, R: GTTGGTGATGATGCCGTGTT       |
| <i>Col 1</i>                   | F: GAGCGGAGAGTACTGGATCG, R: GCTTCTTTTCCTTGGGGTTC       |
| <i>Col 3</i>                   | F: GCACAGCAGTCCAACGTAGA, R: TCTCAAATGGGATCTCTGG        |
| <i>FN</i>                      | F: CCGACCAGAAGTTTGGGTCT, R: CAATGCGGTACATGACCCCT       |
| <i>PLIN2</i>                   | F: GACCTTGTGTCCTCCGCTTAT, R: CAACCGCAATTTGTGGCTC       |
| <i>HK2</i>                     | F: TGATCGCCTGCTTATTCACGG, R: AACCGCCTAGAAATCTCCAGA     |
| <i>PKM2</i>                    | F: GCCGCCTGGACATTGACTC, R: CCATGAGAGAAATCAGCCGAG       |
| <i>LDHA</i>                    | F: TGTCTCCAGCAAAGACTACTGT, R: GACTGTACTTGACAATGTTGGGA  |
| <i>YAP1</i>                    | F: CTCTGAGTGATCCTCTGGTTC, R: CCATAAGAACAAGACCACATCCT   |
| <i>FGF10</i>                   | F: ATGACTGTTGACATCAGACTCCTT, R: CACTGTTCAAGCCTTTTGAGGA |
| <i>CEBP</i>                    | F: CAAGAACAGCAACGAGTACCG, R: GTCACTGGTCAACTCCAGCAC     |
| <i>PPAR<math>\gamma</math></i> | F: TGAATCCAGAGTCCGCTGACCTC, R: ATCGCCCTCGCCTTTGCTTTG   |
| <i>LOX</i>                     | F: TCTTCTGCTGCGTGACAACC, R: GAGAAACCAGCTTGAACCAG       |
| <i>LOXL1</i>                   | F: TGCCCGACAACCTGGAGAGA, R: TGC GGATAGGGGAACTGCT       |
| <i>LOXL3</i>                   | F: CTACTGCTGCTACACTGTCTGT, R: GACCTTCATAGGGCTTTCTAGGA  |
| <i>LOXL4</i>                   | F: GTGCCAAGTATGGTCAAGGAG, R: CCGTTAGAGCCACACTGATCT     |
| <i>PLAT</i>                    | F: AACGCAGACAACCTTACCAACA, R: GTTCGCTGCAACTTCGGAC      |
| <i>CTSK</i>                    | F: GAAGAAGACTCACCAGAAGCAG, R: TCCAGGTTATGGGCAGAGATT    |
| <i>MMP14</i>                   | F: CAGTATGGCTACCTACCTCCAG, R: GCCTTGCCTGTCACTTGTAAG    |
| <i>PLAU</i>                    | F: GCGCCTTGGTGGTGAAAAAC, R: TTGTAGGACACGCATACACCT      |
